# Supplementary material
Source: PubMed Central journal article supplement (PMC3416415)
Supplement: AEM.00595-12_zam999103444so1.pdf [file AEM.00595-12_zam999103444so1.pdf]

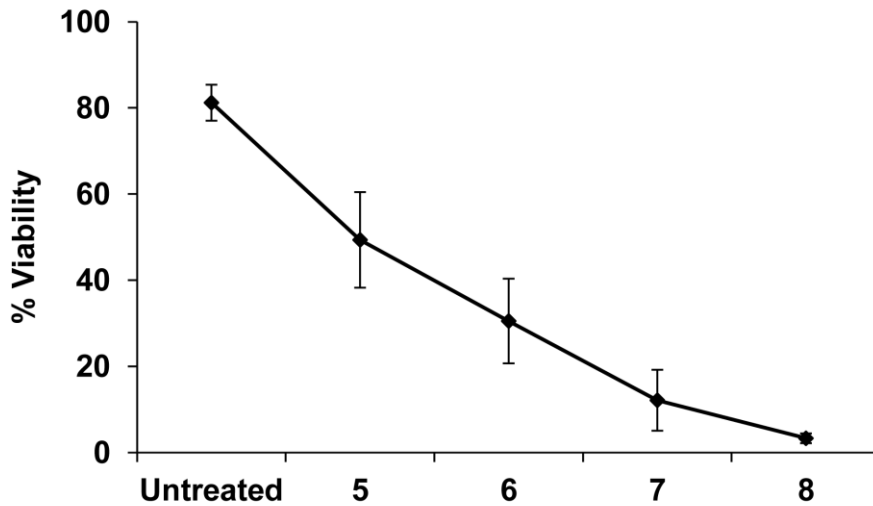

**Fig. S1. *S. aureus* has dose dependent effects on keratinocyte viability.** Undifferentiated untreated cells had a viability of  $81.2 \pm 4.1\%$ . Cells exposed to  $10^5$ cfu/ml *S. aureus* had a viability of  $49.4 \pm 11.1\%$ . Cells exposed to  $10^6$ cfu/ml *S. aureus* had a viability of  $30.5 \pm 9.8\%$ . Cells exposed to  $10^7$ cfu/ml *S. aureus* had a viability of  $12.1 \pm 1.1\%$  while cells exposed to  $10^8$ cfu/ml *S. aureus* had a viability of  $3.3 \pm 1.1\%$ . Linear regression analysis confirmed a linear relationship between concentration and percentage viability ( $p < 0.001$ ). Results are expressed as mean  $\pm$  SEM.

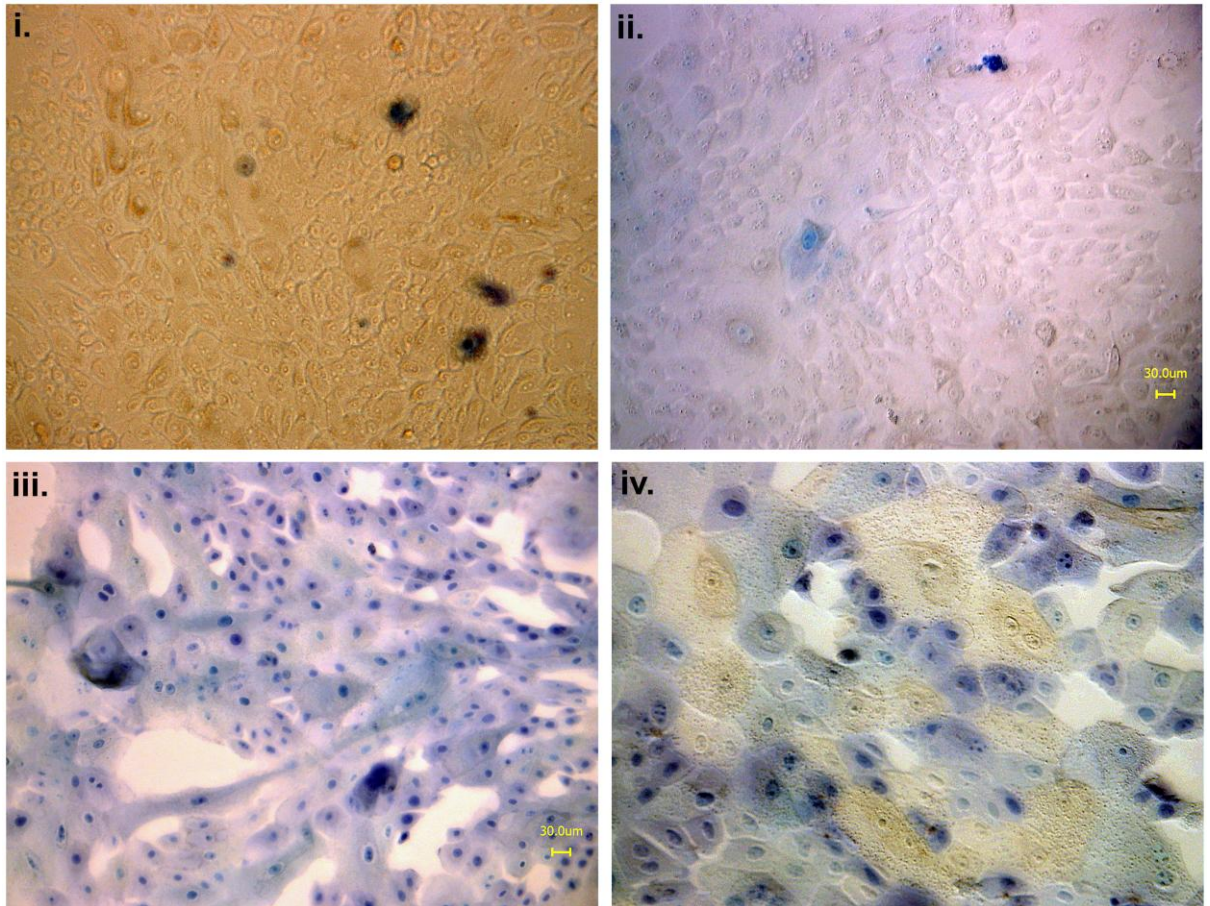

**Fig. S2. Lactobacilli protect undifferentiated keratinocytes from the cytotoxic effects of *S. aureus*.** Representative images of infected cells stained with trypan blue (Magnification x 200). i) No treatment, ii) infected with  $10^8$ cfu/ml *L. reuteri*, iii) exposed to  $10^8$ cfu/ml *S. aureus*, or iv) infected with  $10^8$ cfu/ml *S. aureus* and  $10^8$ cfu/ml *L. reuteri* simultaneously. Images were optimized for contrast and exposure using Adobe Photoshop 3.

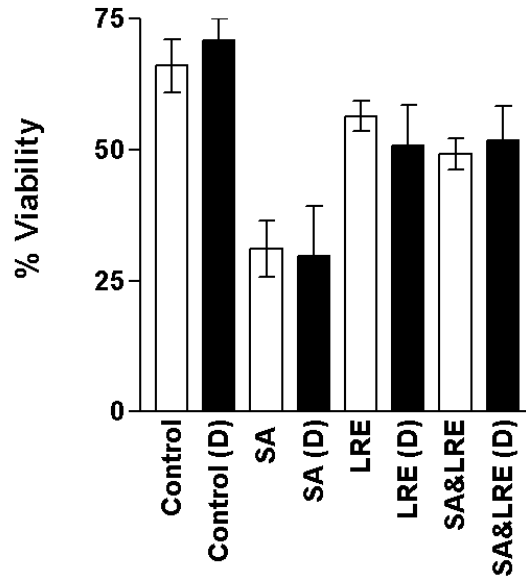

**Figure S3. The viability of undifferentiated NHEK and differentiated NHEK exposed to different combinations of bacteria was not significantly different.** Untreated undifferentiated NHEK had similar viabilities to untreated differentiating NHEK ( $66 \pm 0.8$  % and  $71 \pm 2.8$  % respectively). *S.aureus* treated NHEK had similar viabilities regardless of whether they were undifferentiated (SA) or differentiating (SA (D)) ( $31.1 \pm 3.3$  % and  $29.6 \pm 9.9$  % respectively). *L. reuteri* treated NHEK also had similar viabilities regardless of whether they were undifferentiated (LRE) or differentiating (LRE (D)) ( $56.5 \pm 3.2$  % and  $50.7 \pm 10.6$  %). Finally, cells exposed to *S. aureus* and *L. reuteri* simultaneously had similar viabilities whether undifferentiated (SA&LRE) or differentiating (SA&LRE (D)) ( $49.2 \pm 1.4$  % and  $51.7 \pm 7.5$  % respectively).  $P > 0.05$  in all cases. Results are expressed as the mean  $\pm$  SEM.

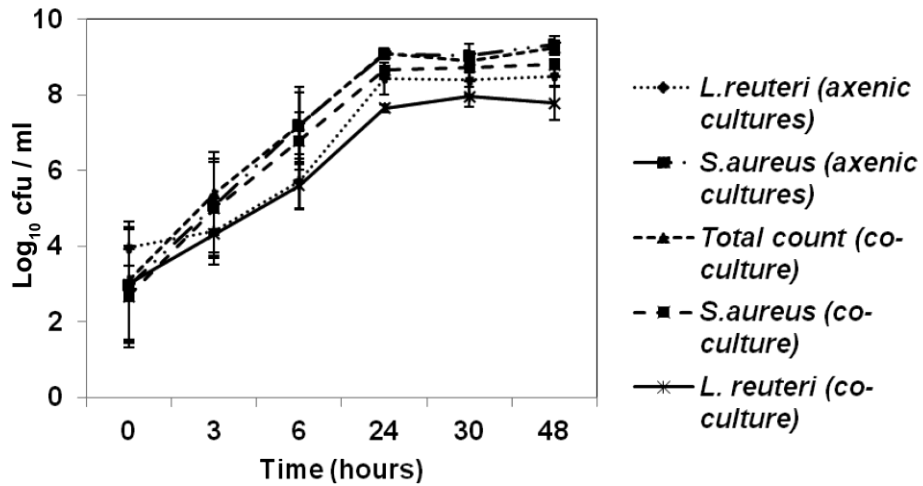

**Fig. S4. *L. reuteri* does not inhibit the growth of *S. aureus* in co-culture.** Competition assay revealing no significant difference between groups over time (P=0.146).

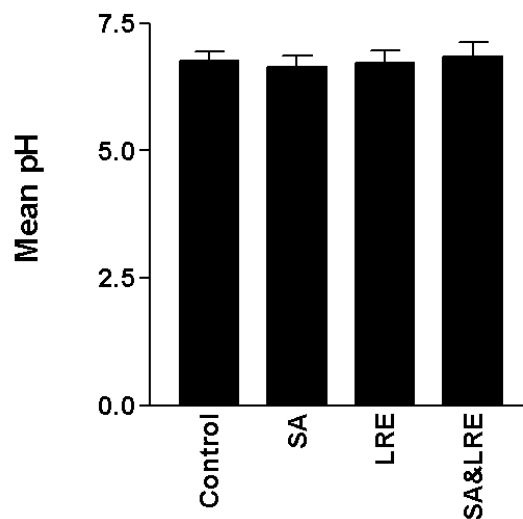

**Figure S5. *L. reuteri* did not change the pH of the cell culture supernatant.** Mean pH of cell cultures that were untreated (buffered, 6.8 ± 0.2), infected with 10<sup>6</sup> cfu/ml *S. aureus* (SA) (6.7 ± 0.2), 10<sup>8</sup> cfu/ml *L. reuteri* (LRE) (6.8 ± 0.3) and cultures infected with both (SA&LRE) (6.9 ± 0.3). There was no significant difference between groups (P=0.9). Results are expressed as the mean ± SEM.

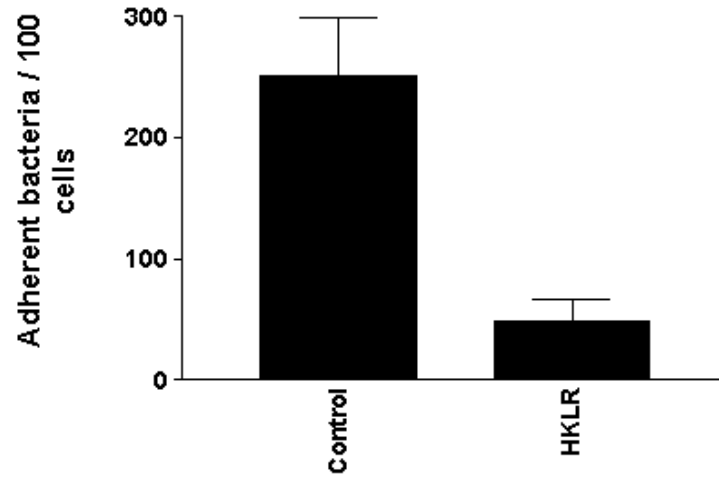

**Figure S6. Heat killed *L. reuteri* does not adhere to keratinocytes as well as live *L. reuteri*.** Untreated control *L. reuteri* adhered significantly better to keratinocytes ( $250 \pm 48$  bacteria/100 cells) compared to heat killed *L. reuteri* (HKLR) ( $48 \pm 19$  bacteria/100 cells) ( $P=0.04$ ). Results are expressed as the mean  $\pm$  SEM.
